# Supplementary material for: Assessing atmospheric moisture effects on heavy precipitation during HyMeX IOP16 using GPS nudging and dynamical downscaling
Source: Copernicus journal article supplement (doi:10.5194/nhess-20-2753-2020), 2020-10-21
Supplement: Supplementary file [file nhess-20-2753-2020-supplement-title-page.pdf › nhess-20-2753-2020-supplement-title-page.pdf]

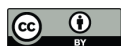

## *Supplement of*

# **Assessing atmospheric moisture effects on heavy precipitation during HyMeX IOP16 using GPS nudging and dynamical downscaling**

**Alberto Caldas-Alvarez and Samiro Khodayar**

*Correspondence to:* Alberto Caldas-Alvarez ([alberto.caldas-alvarez@kit.edu](mailto:alberto.caldas-alvarez@kit.edu))

- [nhess-20-2753-2020-supplement-title-page.pdf](#)
- [suppl\\_mat](#)
  - [Fig\\_S\\_1.jpg](#)
  - [Fig\\_S\\_2.jpg](#)
  - [Fig\\_S\\_3.jpg](#)
  - [Fig\\_S\\_4.jpg](#)
  - [IOP\\_16\\_NHESS\\_third\\_submission\\_supl\\_Figs.docx](#)

The copyright of individual parts of the supplement might differ from the CC BY 4.0 License.
